1 **WATLAS: high throughput and real-time tracking of many small birds in the Dutch**

2 **Wadden Sea**

3

4 Allert I. Bijleveld<sup>1\*</sup>, Frank van Maarseveen<sup>1</sup>, Bas Denissen<sup>1</sup>, Anne Dekinga<sup>1</sup>, Emma

5 Penning<sup>1,2</sup>, Selin Ersoy<sup>1,2</sup>, Pratik Gupte<sup>1,2</sup>, Luc de Monte<sup>1</sup>, Job ten Horn<sup>1</sup>, Roeland Bom<sup>1</sup>,

6 Sivan Toledo<sup>3</sup>, Ran Nathan<sup>4</sup>, and Christine E. Beardsworth<sup>1</sup>

7

8 <sup>1</sup> Department of Coastal Systems, NIOZ Royal Netherlands Institute for Sea Research,

9 NL-1790 AB, Den Burg, Texel, the Netherlands

10 <sup>2</sup> Groningen Institute for Evolutionary Life Sciences (GELIFES), University of

11 Groningen, P.O. Box 11103, 9700 CC Groningen, the Netherlands

12 <sup>3</sup> Blavatnik School of Computer Science, Tel-Aviv University, Tel Aviv 67798, Israel

13 <sup>4</sup> Movement Ecology Laboratory, The Alexander Silberman Institute of Life Sciences,

14 The Hebrew University of Jerusalem, Jerusalem 91904, Israel

15

16 \*Correspondence to [allert.bijleveld@nioz.nl](mailto:allert.bijleveld@nioz.nl)

17

18 **Abstract**

19 Movement is a fundamental aspect of life and tracking wild animals under natural conditions

20 has become central to animal behaviour, ecology, and conservation science. Data from

21 tracked animals have provided novel scientific insights on extreme migratory journeys,

22 mechanisms of navigation, space use, and early warning signals of environmental change.

23 Studying movement is therefore important, particularly in systems that may be vulnerable to

24 anthropogenic effects. Technological advancements, and chiefly the development of GPS

25 tags, have enabled animal tracking at high spatiotemporal resolution, yet trade-offs between

26 cost, sampling frequency, tag weight and data retrieval limit the use of GPS tags to relatively  
27 few individuals and large species. A new ‘reverse-GPS’ wildlife tracking system, ATLAS,  
28 employs an array of receiver stations that detect and localise small (~0.6 g without battery),  
29 low-cost (~25 euro) tags by calculating differences in the arrival time of tag signal at  
30 minimally three stations. In this study, we introduce the Wadden Sea ATLAS system  
31 (WATLAS), implemented in the Dutch Wadden Sea, the Netherland’s only natural UNESCO  
32 World Heritage Site, yet affected by a suite of anthropogenic activities, such as commercial  
33 fishing, mining, shipping, as well as sea level rise. From July 2017 to July 2021, we tracked  
34 821 red knots, 182 sanderlings, 33 bar-tailed godwits, and 6 common terns. With four  
35 examples, we illustrate how WATLAS opens-up possibilities for studying space-use, among-  
36 individual variation in movement, and intra-specific interactions, and inter-specific  
37 (community) space use in the wild. We additionally argue that WATLAS could provide a  
38 tool for impact assessment, and thus aid nature conservation and management of the globally  
39 important Wadden Sea ecosystem.

40

41 **Keywords:** animal tracking, ATLAS, biologging, biotelemetry, conservation, high-  
42 throughput movement ecology, reverse-GPS, shorebirds, space use, Wadden Sea UNESCO  
43 World Heritage Site, waders.

44

## 45 **Introduction**

46 Movement is a fundamental aspect of life and tracking wild animals under natural conditions  
47 has become central to animal behaviour, ecology, and conservation science (Nathan *et al.*  
48 2008; Kays *et al.* 2015; Allen & Singh 2016; Tucker *et al.* 2018; Hays *et al.* 2019). Animal  
49 tracking has revealed extreme and large-scale migratory journeys (Gill *et al.* 2009; Lindström  
50 *et al.* 2021) and detailed patterns of habitat use (Dickie *et al.* 2020; Beardsworth *et al.*  
51 2021b), as well as elucidated mechanisms of navigation (Guilford & Biro 2014; Harten *et al.*  
52 2020; Toledo *et al.* 2020), predator-prey dynamics (Fortin *et al.* 2005), and social interactions  
53 (Strandburg-Peshkin *et al.* 2015). Insights from animal tracking studies are regularly  
54 incorporated in policy and conservation management (Choi *et al.* 2019; Hays *et al.* 2019). For  
55 example, identifying important areas for the protection of migration routes (Middleton *et al.*  
56 2020; Pekarsky *et al.* 2021), detecting wildlife crime (Murgatroyd *et al.* 2019), and  
57 quantifying the human-wildlife conflict (Preisler, Ager & Wisdom 2013).

58 The introduction of the ‘movement ecology’ framework (Nathan *et al.* 2008), coupled  
59 with the rapid development of new tracking technologies and data-processing tools (Joo *et al.*  
60 2020a; Williams *et al.* 2020) has led to an exponential increase in animal movement ecology  
61 research (Joo *et al.* 2020b). These developments, particularly the miniaturization of tags  
62 capable of generating high-throughput localization data for many individuals simultaneously,  
63 allow for novel opportunities to address contemporary questions on individual, group,  
64 population, and community level behaviours in the wild (Börger *et al.* 2020). For instance,  
65 studies on intra-specific variability (Verhoeven *et al.* 2019; Shaw 2020; Hertel *et al.* 2021),  
66 collective behaviour (Strandburg-Peshkin *et al.* 2017), and interactions among individuals  
67 and species with their physical, biotic, and anthropogenic environments (Bedriñana-Romano  
68 *et al.* 2021). Furthermore, the ongoing miniaturization of tags allows tracking ever smaller

69 species, and thus may give a more complete pictures how different species use their habitat  
70 (Kays *et al.* 2015).

71 The most common tracking methods, which allow monitoring the movement of  
72 animals at high temporal and spatial resolution in the wild, are Global Navigation Satellite  
73 Systems (GNSS), such as the Global Positioning System (GPS). Due to trade-offs between  
74 sampling frequency, data retrieval, battery size and tag weight, however, the use of these tags  
75 and the biological insights gained are often limited to larger species (MacCurdy, Gabrielson  
76 & Cortopassi 2011; Kays *et al.* 2015). Moreover, because GPS-tags are expensive, sample  
77 sizes are often small, which limits possibilities for studying intra-specific variation, collective  
78 behaviour, and inter-specific interactions in the wild.

79 ATLAS (Advanced Tracking and Localization of Animals in real-life Systems) is a  
80 reverse-GPS system, developed and deployed by Weller-Weiser *et al.* (2016). ATLAS builds  
81 on the pioneering time-of-arrival wildlife tracking system of MacCurdy *et al.* (2009) and  
82 comprises an array of stationary receivers that continuously listen for transmissions from  
83 small tags. Locations are calculated based on differences in tag-signal arrival times at  
84 minimally three receiver stations. Tags are light-weight (0.6 g without battery and coating)  
85 and relatively inexpensive (25 €), which facilitates tracking small species and hundreds of  
86 individuals simultaneously. Location data is available without retrieval of the tag and in real  
87 time, which avoids the need to recapture tagged animals for data retrieval, and allows for  
88 locating tagged individuals for auxiliary behavioural observations (Ersoy *et al.* in press) or  
89 for confirming mortality (Beardsworth *et al.* 2021b). Whereas GPS systems allow global  
90 tracking, ATLAS requires a local array of receivers. Because signal detection requires a ‘line  
91 of sight’ between the receiver and tag (Xia *et al.* 1993), the regions in which the system can  
92 be utilized are limited. In open landscapes, with published detection ranges up to 40 km  
93 (Toledo *et al.* 2020), its spatial scale limited only by the number of receiver stations. ATLAS

94 has already been established at sites of large scientific or conservation value, such as the Hula  
95 Valley in Israel (Weller-Weiser *et al.* 2016; Toledo *et al.* 2020), and the Wadden Sea, where  
96 reverse-GPS tracking was pioneered (MacCurdy *et al.* 2009; Bijleveld *et al.* 2016).

97         The Wadden Sea is recognized as a UNESCO World Heritage Site for providing a  
98 rich habitat for marine mammals (Aarts *et al.* 2019), fish (van der Veer *et al.* 2015),  
99 invertebrates (Beukema & Dekker 2020), birds (van Roomen *et al.* 2012), and especially  
100 migratory shorebirds (van de Kam *et al.* 2004). Shorebirds form an important component of  
101 the Wadden Sea ecosystem, which they use for breeding (Allen *et al.* 2019), refuelling during  
102 migratory journeys (Rakhimberdiev *et al.* 2018), and finding food and safety during their  
103 non-breeding periods (Piersma *et al.* 1993; van Gils *et al.* 2006b; Bijleveld *et al.* 2016;  
104 Bakker *et al.* 2021). Millions of shorebirds depend heavily on the worms, snails and shellfish  
105 that are found on and in the sediments of the mudflats (Zwarts, Blomert & Wanink 1992).  
106 Perhaps uniquely, over the past decade, the Wadden Sea has been subject to a large scale  
107 benthic macrofauna monitoring survey (Synoptic Intertidal Benthic Survey (SIBES),  
108 Bijleveld *et al.* 2012; Compton *et al.* 2013), which maps food resources for shorebirds  
109 (Bijleveld *et al.* 2016; Oudman *et al.* 2018). Combining resource mapping with the  
110 simultaneous tracking of many birds offers novel opportunities for studies on space use,  
111 trophic interactions and collective behaviour in the wild (King *et al.* 2018). Many of the  
112 shorebird species are declining in numbers (van Roomen *et al.* 2012), and appear particularly  
113 susceptible to the effects of habitat destruction, disturbance, overexploitation of resources,  
114 and global climate change (Boere & Piersma 2012). Detailed studies of shorebird space use,  
115 in conjunction with knowledge of resource landscapes will offer novel ecological insights  
116 and, in combination with monitoring anthropogenic activities, will allow quantifying if and  
117 how animals are impacted, which may assist in evidence-based conservation efforts in this  
118 important region (Piersma & Lindström 2004). The Wadden Sea with its flat and open

119 landscape, large numbers of birds, and conservation value, is an ideal candidate for an  
120 ATLAS system.

121 Here, we introduce the Wadden Sea ATLAS tracking system (WATLAS). In 2017,  
122 WATLAS started with 5 receivers and has since grown to have 26 receivers in 2021, making  
123 it the largest ATLAS system in the world. The 26 receiver stations are located in the western  
124 Dutch Wadden Sea and encompass 1,326 km<sup>2</sup> (Fig. 1) with a focus on the mudflats  
125 surrounding Griend, an important shorebird high-tide roosting site and nature reserve.  
126 WATLAS allows simultaneous tracking of several hundred animals at high temporal and  
127 spatial resolution comparable to GPS tracking (Beardsworth *et al.* 2021a). So far, WATLAS  
128 has been used to track 821 red knots *Calidris canutus* (~120 g), 182 sanderlings *Calidris alba*  
129 (~50 g), 33 bar-tailed godwits *Limosa lapponica* (~240 g), and 6 common terns *Sterna*  
130 *hirundo* (~130 g), but there is scope to track an even larger range of species. Due to the small  
131 and light-weight tags, birds from as little as 20 g (e.g., little stints *Calidris minuta*) can be  
132 tracked, which were previously too small to track remotely at high spatial accuracy. In this  
133 paper, we will first introduce WATLAS. Second, to investigate space use and environmental  
134 drivers of movement, we show how space use of red knots tracked in 2019 varies across the  
135 entire study area and on a small spatial scale across tidal cycles. Third, we give an example of  
136 among-individual variation in distance travelled for red knots tagged in 2020. Fourth, we  
137 show the fine-scale high-resolution movement data WATLAS provides, and how this allows  
138 estimating social interactions (proximity-based networks) in red knots. Fifth, as an example  
139 of community tracking, we show differences in home ranges between sanderlings, red knots,  
140 and common terns near Richel and Griend. We end by discussing how WATLAS offers  
141 possibilities for both fundamental and applied research into the natural and anthropogenic  
142 drivers of bird movement in the Wadden Sea.

143

144 **The WATLAS system**

145 The Wadden Sea ATLAS system (WATLAS) comprises an array of receivers that  
146 continuously listen for tag transmissions. When a transmission is detected, the receiver  
147 records the arrival time. These arrival time measurements are sent to a centralized server  
148 where location estimates can be computed when at least three receivers detect the signal.  
149 Receivers can detect a transmission from any tag in the system at any time, so the tags can  
150 transmit as frequently as a localization is needed. Beacons (tag-like transmitters in fixed  
151 known locations) enable clock-synchronisation across receiver stations.

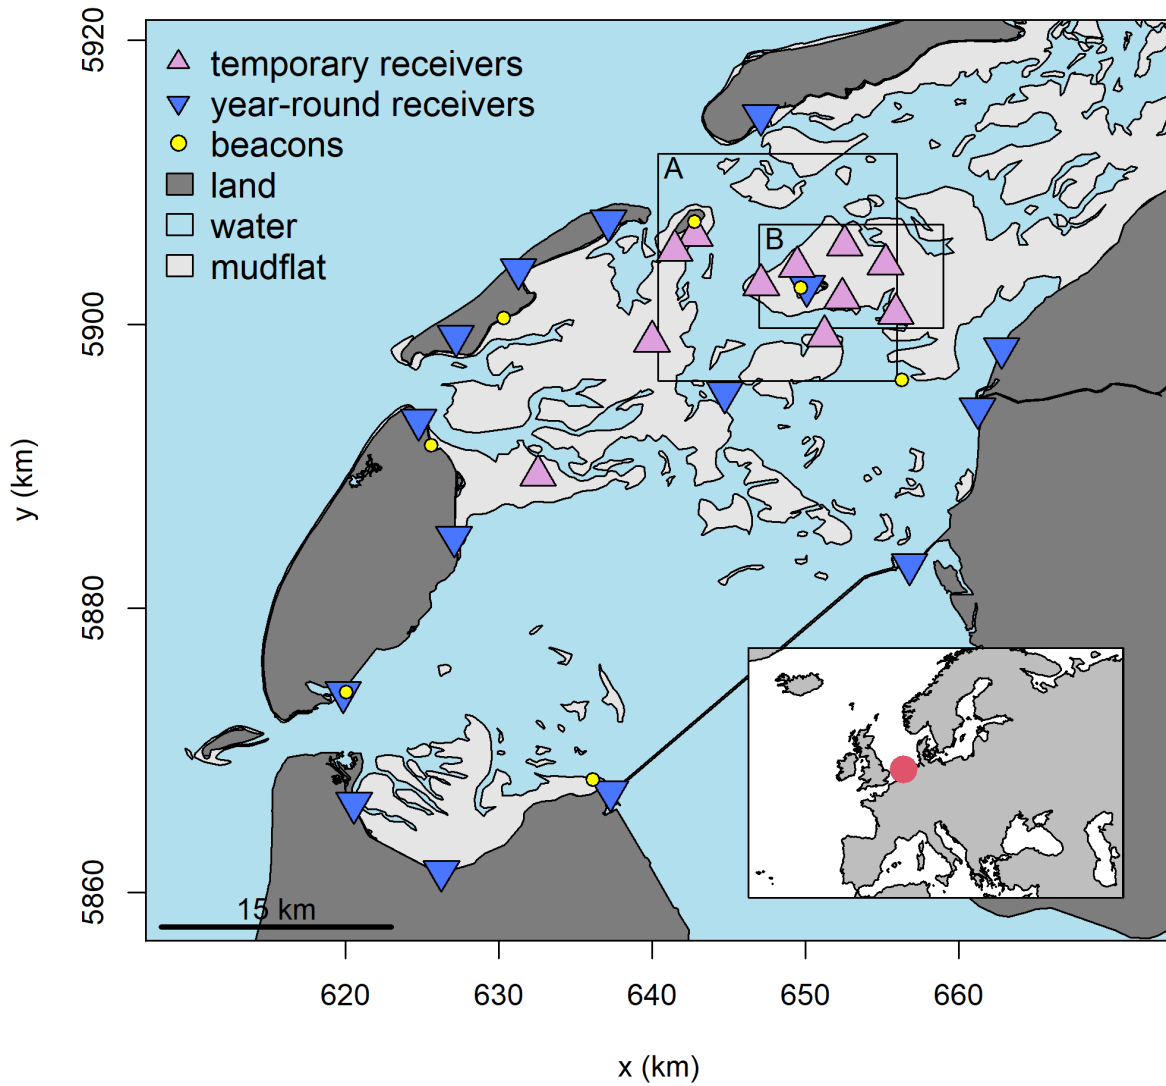

159

## 160 RECEIVERS

161 The WATLAS system currently consists of 26 receiver stations located in the western

162 Wadden Sea (Fig. 1). Fourteen receivers were installed on buildings and other stable

163 structures where power was available, which allowed receivers to be operational year-round.



164 One year-round receiver was placed high on a dune and powered with twelve 100 W solar  
165 panels (EnjoySolar). Eleven receivers were placed temporarily on the mudflats. Because of  
166 the increased likelihood of weather damage in winter, the temporary receivers (Fig. 2) were  
167 only in place between July and November each year. One of these temporary receivers was  
168 placed on an anchored pontoon that housed a solar powered field station (Fig. 2C). The other  
169 ten temporary receivers were attached to scaffolds (Fig. 2A and B) and powered with four  
170 100 W solar panels (EnjoySolar) and a 100 W wind turbine (Ampair), which were connected  
171 to three 100 Ah AGM batteries (Beaut). For visibility and safety, a solar powered LED-light  
172 was placed on top of the scaffold.

173

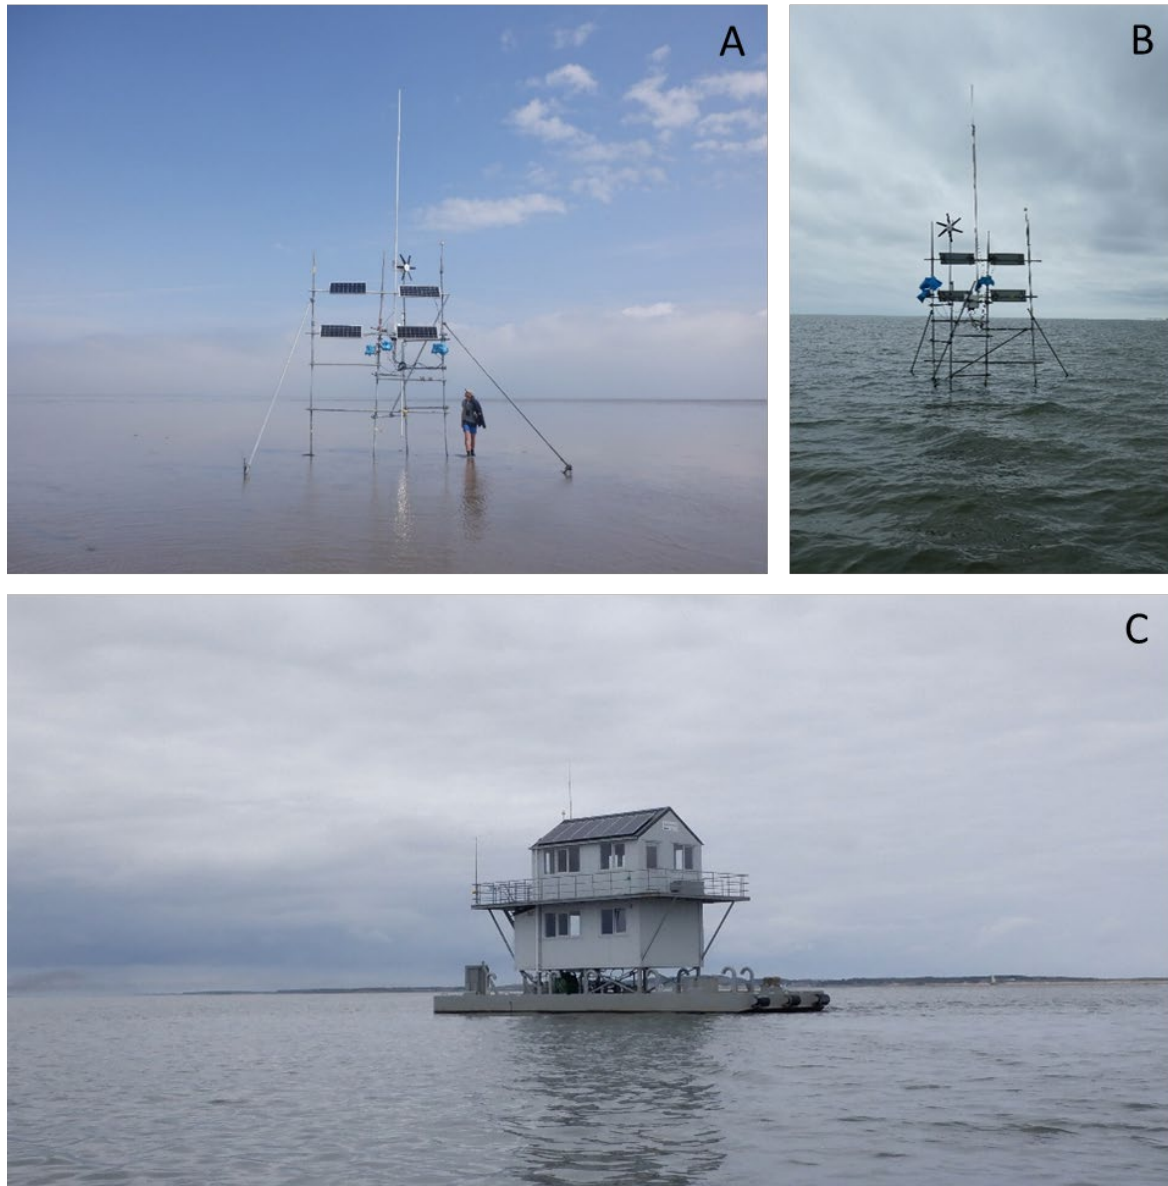

175 **Fig. 2** Examples of the temporary solar- and wind powered receiver stations placed on  
176 mudflats shown at A) low tide and B) high tide, and C) on the field station.  
177

178 Each receiver had a 1.5 m Ultra High Frequency (UHF) antenna (Diamond X-50N) mounted  
179 on a 6 m aluminium scaffold. To increase the range of tag detections, receiver antennas were  
180 placed as high as possible. Antenna height for temporary receivers in 2019 was on average  
181 9.5 m (range: 8.4 – 11.7 m) above sea level, and on average 18.7 m (range: 10.9 to 44.4 m)  
182 for year-round receivers.

183 A coaxial cable connected the antenna to a water-proof cabinet (53 x 43 x 20 cm,  
184 Supplementary Fig. S1) via a custom built external Low Noise Amplifier (LNA). The LNA

185 includes a helical bandpass filter to protect against static discharge from thunderclouds.  
186 These LNAs connect to a custom front-end unit that acts as a bandpass filter, radio frequency  
187 limiter, and power supply to the LNAs (Melamed & Toledo 2017). Next comes the Software  
188 Defined Radio (SDR) consisting of an USRP N200 with WBX40 daughter board (Ettus  
189 Research). This SDR precisely timestamps incoming signal detections using a GPS  
190 disciplined oscillator (GPSDO, Ettus Research). The GPSDO was connected to an external  
191 amplified ceramic patch antenna (Ettus Research), which allowed the clock rates of all  
192 receivers to be synchronized with the atomic clocks from GPS-satellites. Signal transmissions  
193 are processed by an onboard computer (Intel NUC i7) that runs Linux (Ubuntu 16 or 20). The  
194 number of unique tags the WATLAS systems can detect depends on the processing capability  
195 of this Intel NUC. With our onboard computers, we estimate that we can reliably track 300  
196 unique tags that send a transmission every second simultaneously. All receiver stations were  
197 connected to internet using a 3G cellular modem (Huawei E3372 4G/LTE dongle) and an  
198 externally mounted antenna (GTT OS-UMTS-0103-C0) to send detection reports to a central  
199 server at NIOZ Royal Institute for Sea Research. This server runs software that estimates tag  
200 locations from time-stamped tag and beacon detections (Weller-Weiser *et al.* 2016). All data  
201 are stored in an online database running MySQL (v5.7, <https://www.mysql.com/>).

202 Localizations are visualised on [www.nioz.nl/watlas](http://www.nioz.nl/watlas) in real-time.

203

## 204 TAGS

205 Tags consist of an assembled Printed Circuit Board (PCB), a battery, an antenna, and a  
206 protective coating (Fig. 3). The PCBs are based on a CC1310 or CC1350 microcontroller  
207 with a built-in Radio-Frequency (RF) transceiver that can transmit a code unique to the tag at  
208 433 MHz. The radio signal is emitted through a 17 cm long antenna made of gold plated  
209 multistranded steel wire with a plastic coating, which can handle mechanical stress in a

210 marine environment. Tags were coated with a mixture of two-component epoxy (3M Scotch  
211 Weld DP270). To reduce tag weight, the epoxy was mixed with low density glass spheres at a  
212 ratio of 1:2. PCB's are fitted with a (Hall) sensor allowing the tag to be switched on and off  
213 with a magnet placed next to the tag. Tags operate at a voltage of 1.8 to 3.8 V and can be  
214 fitted with a range of batteries. For example, a pair of silver oxide batteries (0.26 g), single  
215 lithium coin-cell batteries ranging from CR1025 (0.7 g) to CR2477 (10.5 g), or a pair of AA  
216 batteries (24 g). At signal transmission costs of approximately 0.4 mJ, the capacity of the  
217 battery determines the number of transmissions that can be sent, and together with the  
218 frequency of transmissions, sets the tag's operational lifetime (longevity). In 2017 and 2018  
219 we used tag transmission intervals of 1 or 3 s, and in later years 6 s. With WATLAS, we have  
220 used CR1620 (1.3 g) and CR2032 batteries (3.0 g), which resulted in final tag weights of  
221 respectively 2.4 and 4.4 g (Fig. 3). With a signal transmission interval of 6 s this corresponds  
222 to an estimated longevity of 3 and 8 months for the lighter and heavier tag, respectively.  
223

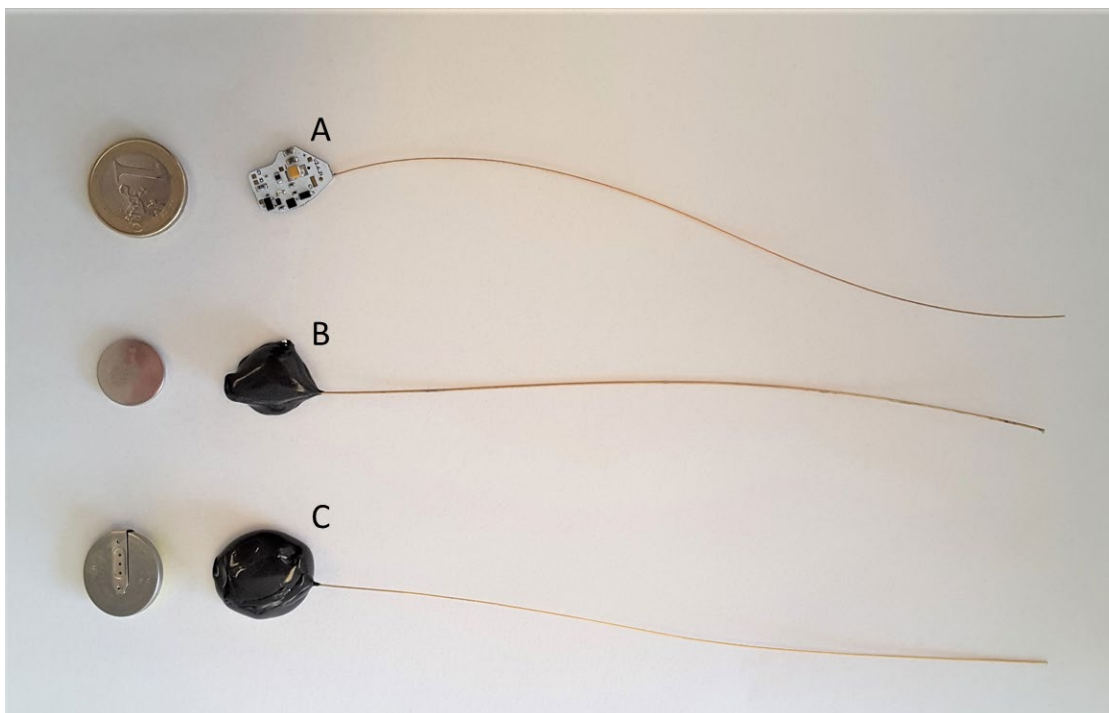

225 **Fig. 3** *WATLAS* tags and batteries. A) tag without battery and coating and a one-euro coin  
226 for scale. B) 2.4 g coated tag with CR1620 battery. C) a 4.4 g coated tag with CR2032  
227 battery. The batteries of the tags are shown on the left.

228

## 229 BEACONS

230 Beacons were built as standard *WATLAS* tags, but fitted with one lithium C cell and a helical  
231 bandpass filter to protect against static discharge from thunderclouds and connected to a  
232 vertical colinear antenna providing 7dB gain in the horizontal plane (Diamond X-50N)  
233 identical to the antennas on receivers. The transmission interval of beacons was set to 1 s.  
234 Seven beacons were mounted on 6 m aluminium scaffold poles (Supplementary Fig. S2). To  
235 ensure that each receiver detected at least one beacon consistently, beacons were placed  
236 across the study area (Fig. 1). During deployment, the locations of receivers and beacons  
237 were recorded with dGPS at 1.5 cm accuracy (Topcon HiPer SR).

238

## 239 WATLAS COSTS

240 The most substantial costs are setting up an initial array of receivers. The costs of *WATLAS*  
241 components fluctuate, and more economical configurations are being developed. However, at  
242 the time of writing the receiver cabinet with the radio frequency electronics costs about 4,500  
243 €. For receiver stations that require independent power supply, the equipment for generating  
244 wind and solar power costs an additional 5,000 €. Tag cost is dominated by costs of  
245 assembling the electronics, and this largely depends on the numbers of tags produced in a  
246 batch: 100 € each at 20 pcs and 22 € each at 200 pcs. The labour costs of tag assembly can  
247 easily cost an equal amount. Operational costs can be quite substantial as well, such as those  
248 for mobile data transfer. For example, between August and November 2018 receivers  
249 transferred an average of 14 GB of data per month (7 to 18 GB per receiver per month). Per  
250 receiver, the monthly costs for an unlimited data plan were 35 €.

251

252 TRACKING SHOREBIRDS WITH WATLAS

253 We present examples from red knots tracked between 2018-2020 (N = 668), sanderling  
254 tracked in 2018 (N = 94) and common terns in 2021 (N = 3). Red knots were caught on  
255 Richel (53.28° N, 5.01° E) and Griend (53.25° N, 5.25° E) (Fig. 1) with mist nets during new  
256 moon periods each year between July and October. In 2018, 2019 and 2020 we respectively  
257 tracked 193, 226 and 249 red knots. Most sanderling (N = 82) were caught on Griend by  
258 means of canon netting on 26 July 2018, but some by mist-netting on 12 August 2018 (N = 2)  
259 and 10 September (N = 10). Within a pilot experiment, three incubating common terns were  
260 caught with spring traps (TW45, Moudry) on Griend on 3 June 2021. All birds were banded  
261 with unique combinations of colour-rings and released after gluing a WATLAS tag to their  
262 rump with cyanoacrylate glue (Fig. 4). Red knots were fitted with 4.4 g tags (Fig. 3C) that  
263 were on average 3.2 % (SD = 0.2) of body mass. Sanderling and common terns were fitted  
264 with 2.4 g tags (Fig. 3B) that were on average 4.4 % (SD = 0.4) of body mass for sanderling  
265 and 2.0 % (SD = 0.2) for common terns. All birds were released from Richel and Griend.

266

267

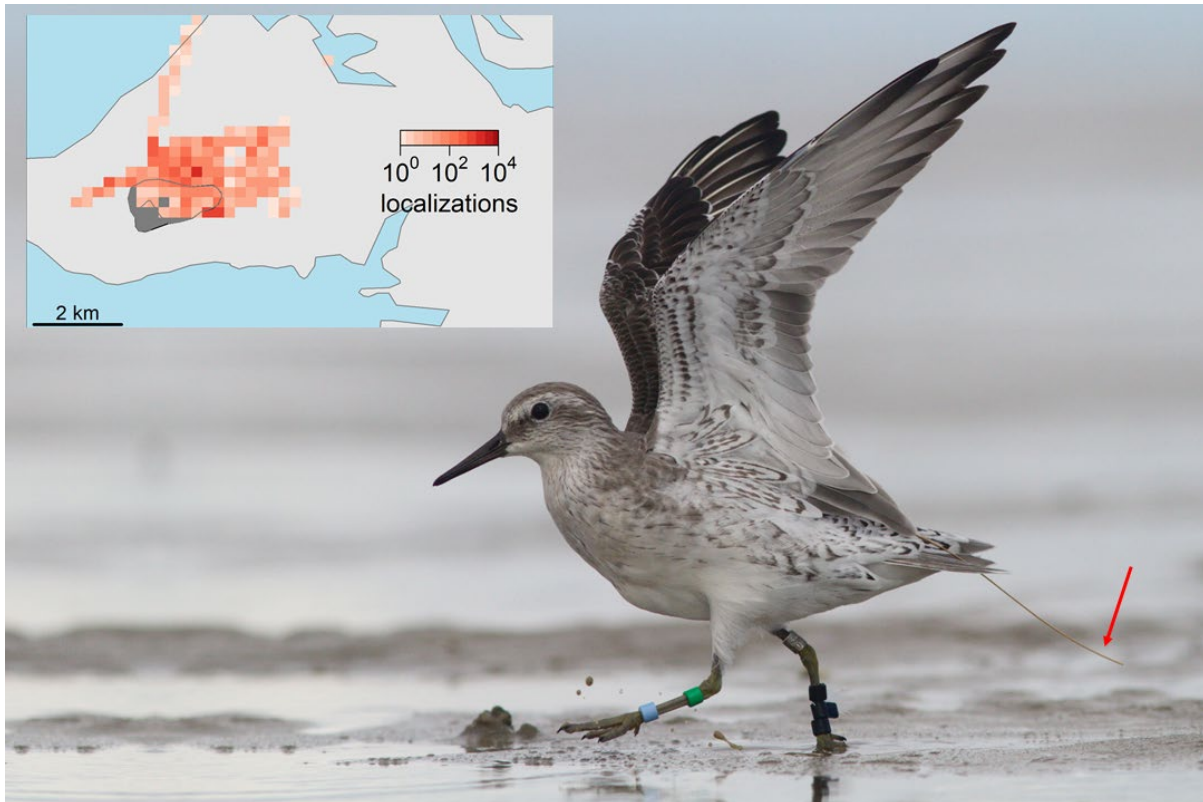

269 **Fig. 4** A colour-ringed red knot in winter plumage, bearing a WATLAS tag glued to its rump;  
270 the tag antenna can be seen extending beyond the tail to the right of the image as indicated  
271 with the red arrow. WATLAS tags allow free movement of the wings and fall off as the  
272 feathers underneath the tag regrow. The inset shows this bird's localizations around Griend,  
273 collected between 15 September and 21 September 2017. See rectangle B in Fig. 1 for  
274 placement of the inset within the study area. © map data from Rijkswaterstaat, and photo  
275 taken on 16 September 2017 by Benjamin Gnep.  
276

#### 277 PRE-PROCESSING WATLAS DATA TO IMPROVE POSITION ESTIMATES

278 The accuracy of WATLAS localizations is comparable to conventional GNSS systems  
279 (Beardsworth *et al.* 2021a) and to the Hula Valley ATLAS system (Weller-Weiser *et al.*  
280 2016). However, in common with other positioning systems, WATLAS data can contain  
281 some inaccurate localization estimates. Filtering and smoothing such data, to reduce errors in  
282 positioning estimates, is common practice in movement ecology (Gupte *et al.* in press). Here,  
283 we used a simple filter-smoothing process on the raw data using the error estimates, namely  
284 variance in the Easting and Northing (VARX and VARY). We removed localizations that had  
285 high VARX and VARY (>2,000) and smoothed the data by computing a 5-point median

286 smooth across the localizations (Bijleveld *et al.* 2016; Gupte *et al.* in press), which can reduce  
287 the localization error to several metres (Beardsworth *et al.* 2021a).

288

## 289 **EXAMPLES OF WATLAS**

290 We will demonstrate examples for how WATLAS opens-up possibilities for studying space-  
291 use and environmental drivers of movement, among-individual variation in distance travelled,  
292 intra-specific (social) interactions, and community tracking with interspecific space use in the  
293 wild. All analyses were done in R v4.0.2.

294

### 295 **EXAMPLE 1. ESTIMATING SPACE-USE**

296 To show how WATLAS can be used to investigate space use and e.g. identify hotspots, we  
297 created heatmaps of the localisations of 221 red knots tracked between 1 August 2019 and 1  
298 November 2019 (92 days). We created heatmaps at two spatial scales: The large spatial scale  
299 of the entire study area in grid cells of 500 x 500 m, as well as the smaller spatial scale  
300 around Richel and Griend with grid cells of 250 x 250 m. To additionally illustrate how  
301 WATLAS data can be used to investigate environmental drivers of space use, we created  
302 heatmaps on the smaller spatial scale separately for the different phases of the tidal cycle. The  
303 tidal-phases were selected based on the water level (NAP; Amsterdam Ordnance Datum) at  
304 the tide gauge at West-Terschelling (53.37° N, 5. 22° E): high tide (> 100 cm NAP), first ebb  
305 tide (outgoing tide between 50 and 100 cm NAP), second ebb tide (outgoing tide between -50  
306 and 50 cm NAP), low tide (< -50 cm NAP), first flood tide (incoming tide between -50 and  
307 50 cm NAP), second flood tide (incoming tide between 50 and 100 cm NAP). These tags  
308 were programmed to transmit every 6 s, thus each location represents at least 6 s of space use.

309         The large-scale heatmap confirmed that Richel and Griend, where the knots were  
310 caught, are hotspots. Nonetheless, red knots spread-out across the entire study area (Fig. 5). It



311 should be noted, however, that because the density of receivers is higher at Richel and  
312 Griend, the relative number of localizations could be exaggerated compared to the rest of the  
313 study area. As can be seen from the localizations over relatively deep gullies, several birds  
314 moved between islands and the mainland (Supplementary Fig. S3). Likewise, localizations  
315 across the North Sea suggest that birds crossed in the direction of the United Kingdom. In  
316 some cases, these birds were detected up to 34 km from the closest receiver.

317         On a smaller spatial scale, the heatmaps for different phases of the tidal cycle around  
318 Richel and Griend showed how the tidal dynamic affects space use of red knots on a  
319 population level (Fig. 6). With the outgoing tide, the birds moved out on the now-exposed  
320 mudflats in search of invertebrate prey. Interestingly, space-use differed between ebb and  
321 flood tides even though the water level was the same. This can, for instance, be seen by  
322 comparing Fig. 6C with 6E, and Fig. 6B with 6F. The fewest localizations were observed  
323 during the low tide period, probably because birds spread out and even moved outside the  
324 tracking area. With the incoming tide the birds returned and aggregated on Richel and  
325 Griend.

326

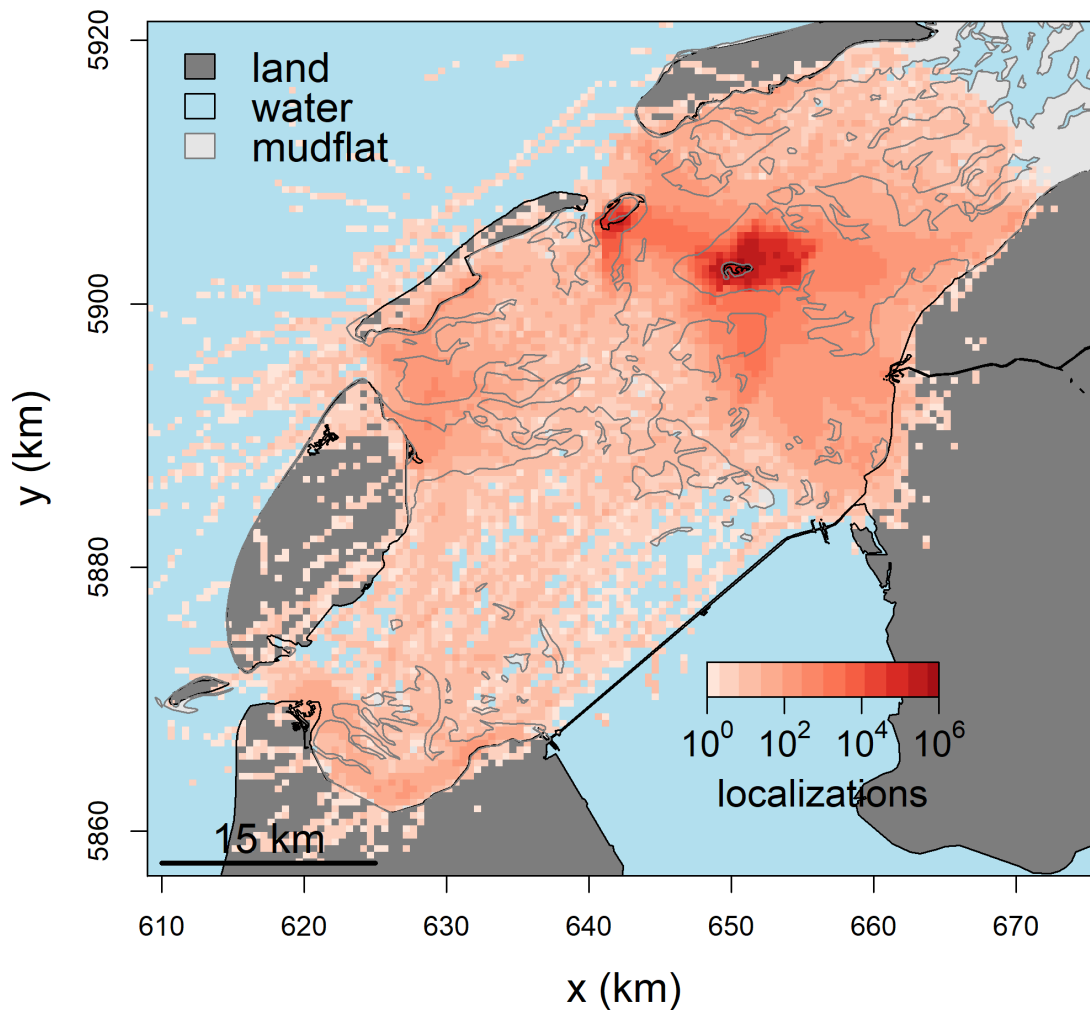

328 **Fig. 5** Large-scale space use of 221 red knots tracked between 1 August and 1 November  
329 2019 (92 days) within the entire study area. The colour scale represents the number of  
330 localizations in 500 x 500 m grid cells. Note that the colour scale is logarithmic. Water is  
331 coloured blue, land dark grey, and mudflats light grey with a solid line indicating their  
332 boundary. Because the tags send a signal at 1/6 Hz, each localization represents a minimum  
333 of 6 s of space use for red knots. The coordinate system refers to UTM 31N. © map data from  
334 Rijkswaterstaat.  
335

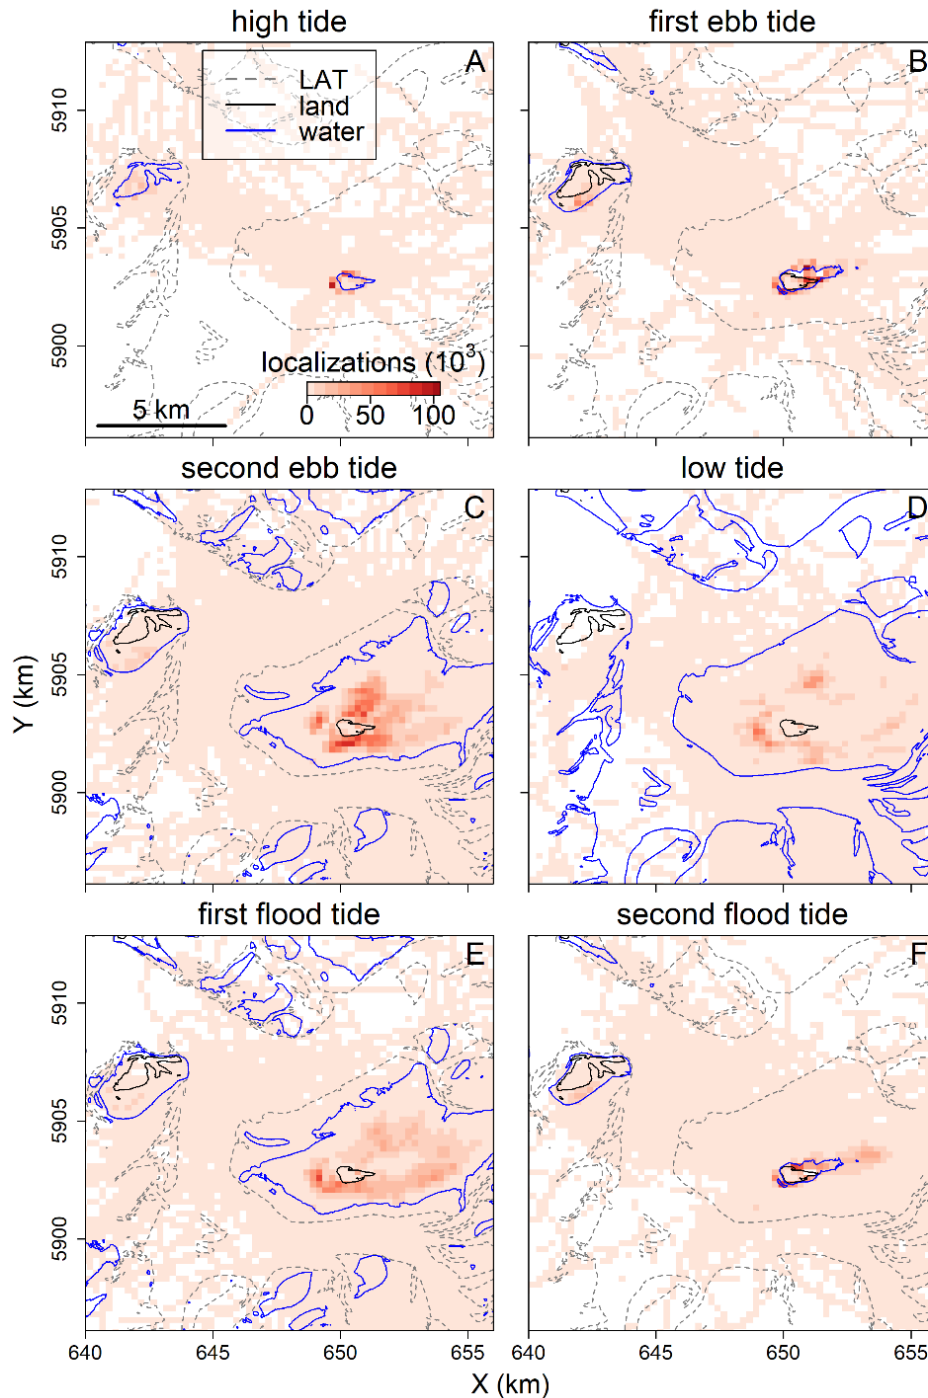

337 **Fig. 6** Small-scale space use during different phases of the tidal cycle for 221 red knots near  
338 Richel and Griend between 1 August and 1 November 2019 (92 days). Panels show different  
339 phases of the tidal cycle from high tide (panel A), through ebb tide (panels B and C), to low  
340 tide (panel D) and flood tide (panels E and F). The colour scale represents the number of  
341 localizations in 250 x 250 m grid cells. The boundary of mudflats are indicated with a grey  
342 dashed line (i.e. the Lowest Astronomical Tide, LAT). The blue line indicates the lowest water  
343 level within the different tidal phases. Land is indicated with a solid black line. Because the  
344 tags send a signal at 1/6 Hz, each localization represents a minimum of 6 s of space use for  
345 red knots. See rectangle A in Fig. 1 for placement of this map within the study area. The  
346 coordinate system refers to UTM 31N. © map data from Rijkswaterstaat.  
347

348 EXAMPLE 2. AMONG-INDIVIDUAL VARIATION IN MOVEMENT

349 To illustrate the large-scale application of WATLAS tracking and to explore among-  
350 individual variation in space use, we selected data from seven red knots (out of 44) on 17  
351 October 2020. These tags were programmed to transmit every 6 s. Additionally, we  
352 calculated cumulative distance between successive localizations to reveal variation in daily  
353 distances travelled for all individuals tracked that day.

354 Red knots were successfully localized in large parts of the study area, though gaps in  
355 the tracks also occurred (Fig. 7). The tracking data revealed substantial differences among  
356 individuals in the distance travelled over a 24-hour period, which ranged between 42 and 328  
357 km day<sup>-1</sup> for all 44 birds (mean±SD: 131±49 km d<sup>-1</sup>, histogram in Fig. 7). There were also  
358 differences in the number of localizations between birds (mean = 2,111 bird<sup>-1</sup>; range = 144 -  
359 3,680), which significantly explained distance travelled per day (slope = 26.3 m per  
360 localization, p<0.01). Nonetheless, when dividing the distance travelled by the number of  
361 localizations per bird, there were still large among-individual differences (mean = 83.1 m per  
362 localization; range = 27.3 - 316.5), which shows that the among-individual variation in  
363 distance travelled is not merely caused by differences in the number of successful  
364 localizations.

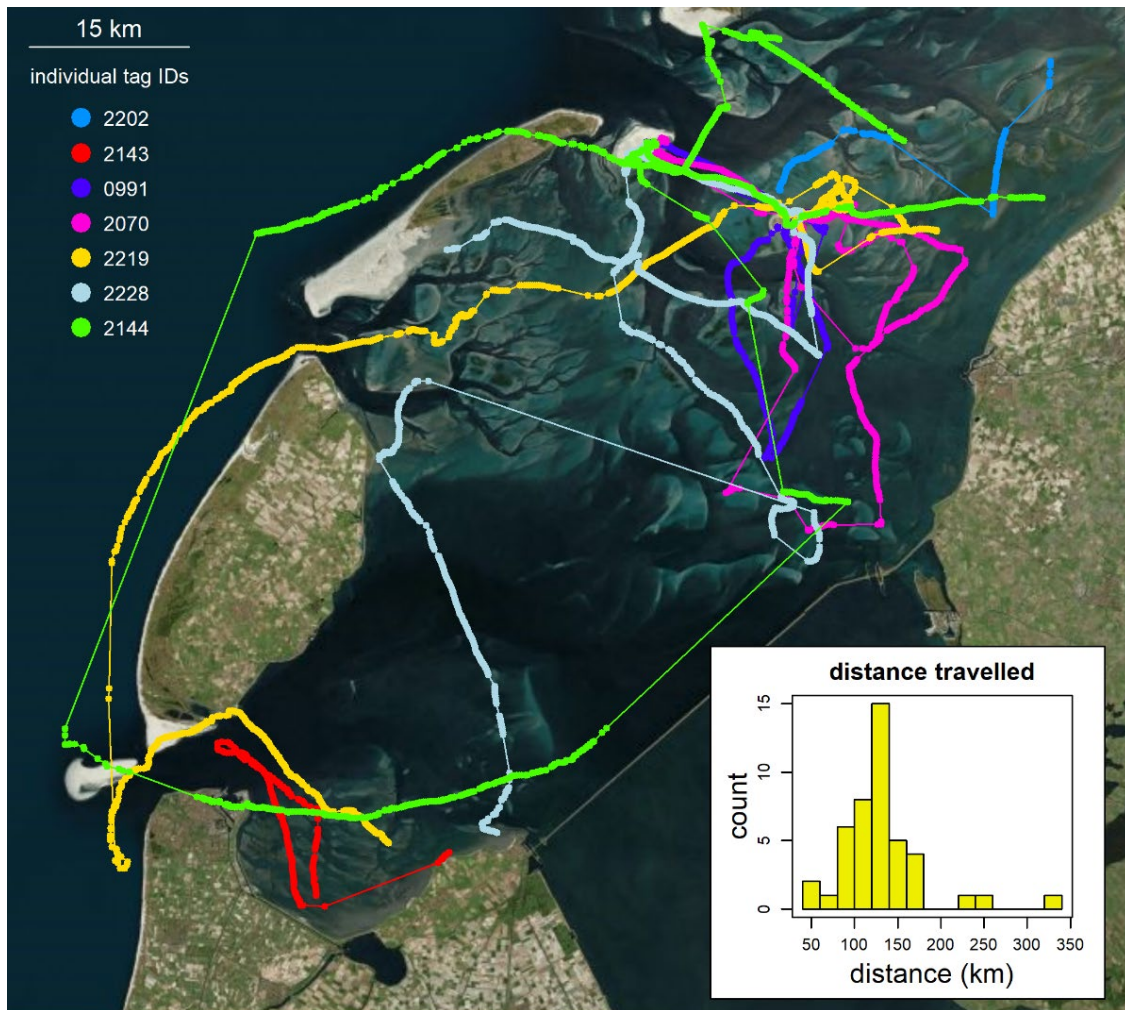

366 **Fig. 7** Tracks for a subset of seven individual red knots that differ in the spatial scale of  
367 space use across the entire study area. Data collected over 24 hours on 17 October 2020 are  
368 shown. The inset shows the histogram of cumulative distance travelled for all 44 birds  
369 tracked on this day. © map data from OpenStreetMap.  
370

### 371 EXAMPLE 3. FINE SCALE MOVEMENT AND INTRA-SPECIFIC INTERACTIONS

372 To illustrate the application of high-resolution WATLAS data for investigating social  
373 interactions, we selected seven red knots tracked near Griend (Fig. 1) between two high tides  
374 at 00:50 and 13:16 CEST on 31 August 2018. These data, recorded at 1/3Hz, were aggregated  
375 into 30 s timesteps, and the mean coordinates were calculated. Within these time steps, social  
376 proximity was defined as being within 50 m of each other (Farine & Whitehead 2015). The  
377 social network was created in R with the library ‘spatsoc’ (Robitaille, Webber & Vander Wal  
378 2019).

379 The fine-scale movement patterns of the red knots show (Fig. 8) that birds roosted on Griend  
380 during high tide and, as the water recedes with the ebb tide, moved out onto the exposed  
381 mudflat to forage. While foraging, the birds walked across the mudflat, which resulted in  
382 areas with dense localizations. Birds flew between different areas to forage as can be seen by  
383 the areas of dense localizations connected by lines with sparser localizations (flight). An  
384 animation of the fine-scale movement with the incoming tide can be found in the supplement  
385 (Supplementary Animation A1). Tracking the fine-scale movements of many tagged animals  
386 allows for the investigation of inter-individual interactions. For instance, the proximity-based  
387 social network of our subset of seven red knots revealed that some individuals were often in  
388 close proximity (e.g. birds with tag IDs 409 and 412; Fig. 8), whereas some individuals were  
389 rarely close to the other individuals. The individual with tag ID 458 was mostly static, hence  
390 rarely close to any other tagged individual within this period. The comparison between the  
391 tracks and proximity network further shows the merit of collecting fine-scale high-resolution  
392 tracking data. Visually, for example, the individual with tag ID 409 seems to have much  
393 higher overlap with the individual with tag ID 418 than with the individual with tag ID 412.  
394 Nonetheless, the spatiotemporal proximity network shows that individuals with tag IDs 409  
395 and 412 have the highest overlap.  
396

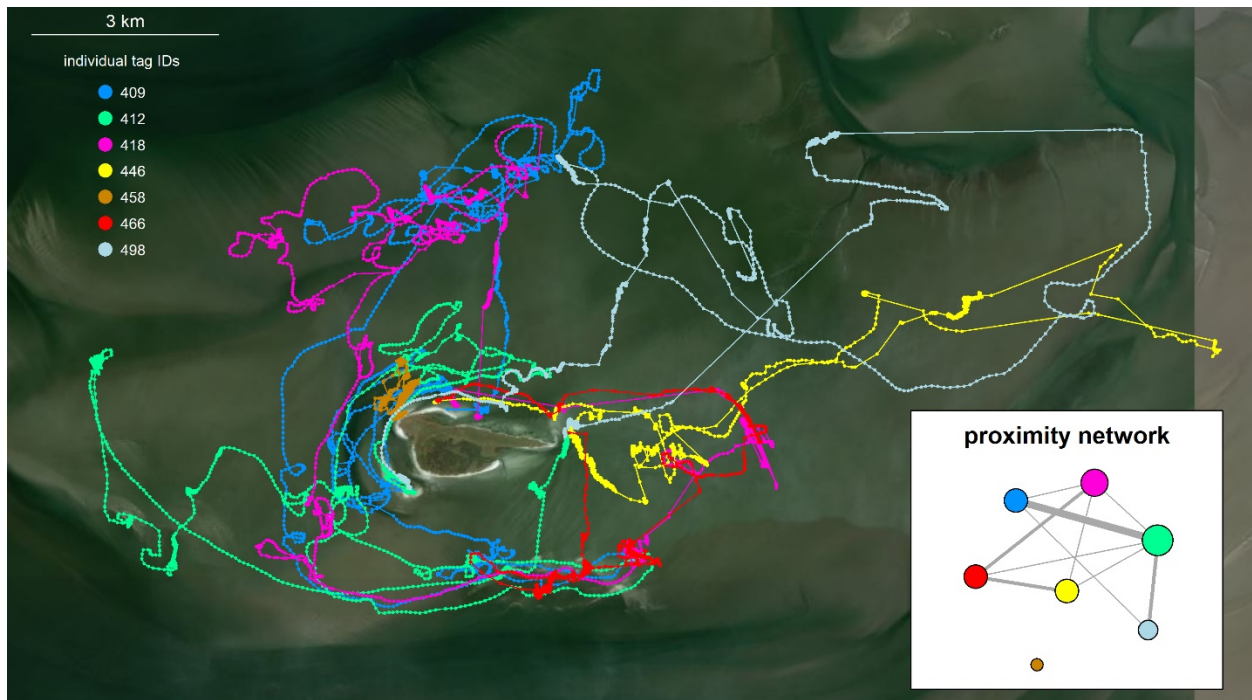

398 **Fig. 8** Detailed movements from a subset of seven tracked individual red knots around  
399 Griend. Data between two high tides at 00:50 and 13:16 CEST on 31 August 2018 are  
400 shown. The inset shows the proximity network for these seven birds based on a spatial  
401 proximity of 50 m (see methods). In total, 79 individuals were localized in this timeframe for  
402 which an animation of their movement relative to the tide can be found in the Supplementary  
403 Information. See rectangle B in Fig. 1 for placement of this map within the study area. © map  
404 data from OpenStreetMap.  
405

#### 406 EXAMPLE 4. COMMUNITY TRACKING

407 Tracking individuals from different species within one region, allows investigations of inter-  
408 specific space use. To show how space use, comprised of individual movements, scales up to  
409 community-level space use, we analyse differences in the home ranges of sanderlings, red  
410 knots, and common terns. The terns were included because they use a very different  
411 (foraging) niche than shorebirds, and thus are expected to differ in space use. Kernel densities  
412 were calculated with the R-library ‘amt’ (Signer, Fieberg & Avgar 2019) for 74 sanderling  
413 tracked between high tides 9:25 and 21:45 CEST on 26 July 2018, 66 red knots tracked  
414 between high tides 9:46 and 22:06 CEST on 25 August 2018, and 3 common terns tracked  
415 during the whole day on 6 June 2021.

416           The home-range analyses show that although sanderlings and red knots both roost on  
417 Richel and Griend, they differ in their low-tide distribution (Fig. 9). The home range of  
418 sanderlings appeared larger than that of red knots and included the intertidal flats to the west  
419 of Griend. The differences in space use between sanderlings and red knots might be related to  
420 differences in the behaviour and spatial distribution of their prey. For instance, red knots  
421 forage on patchily distributed and relatively sessile shellfish, whereas sanderlings forage on  
422 shrimp that are mobile and follow the tide. As expected from their piscivorous diet, common  
423 terns foraged in the relatively deep gullies instead of on intertidal flats like the shorebirds,  
424 and showed the largest home range between the three species.



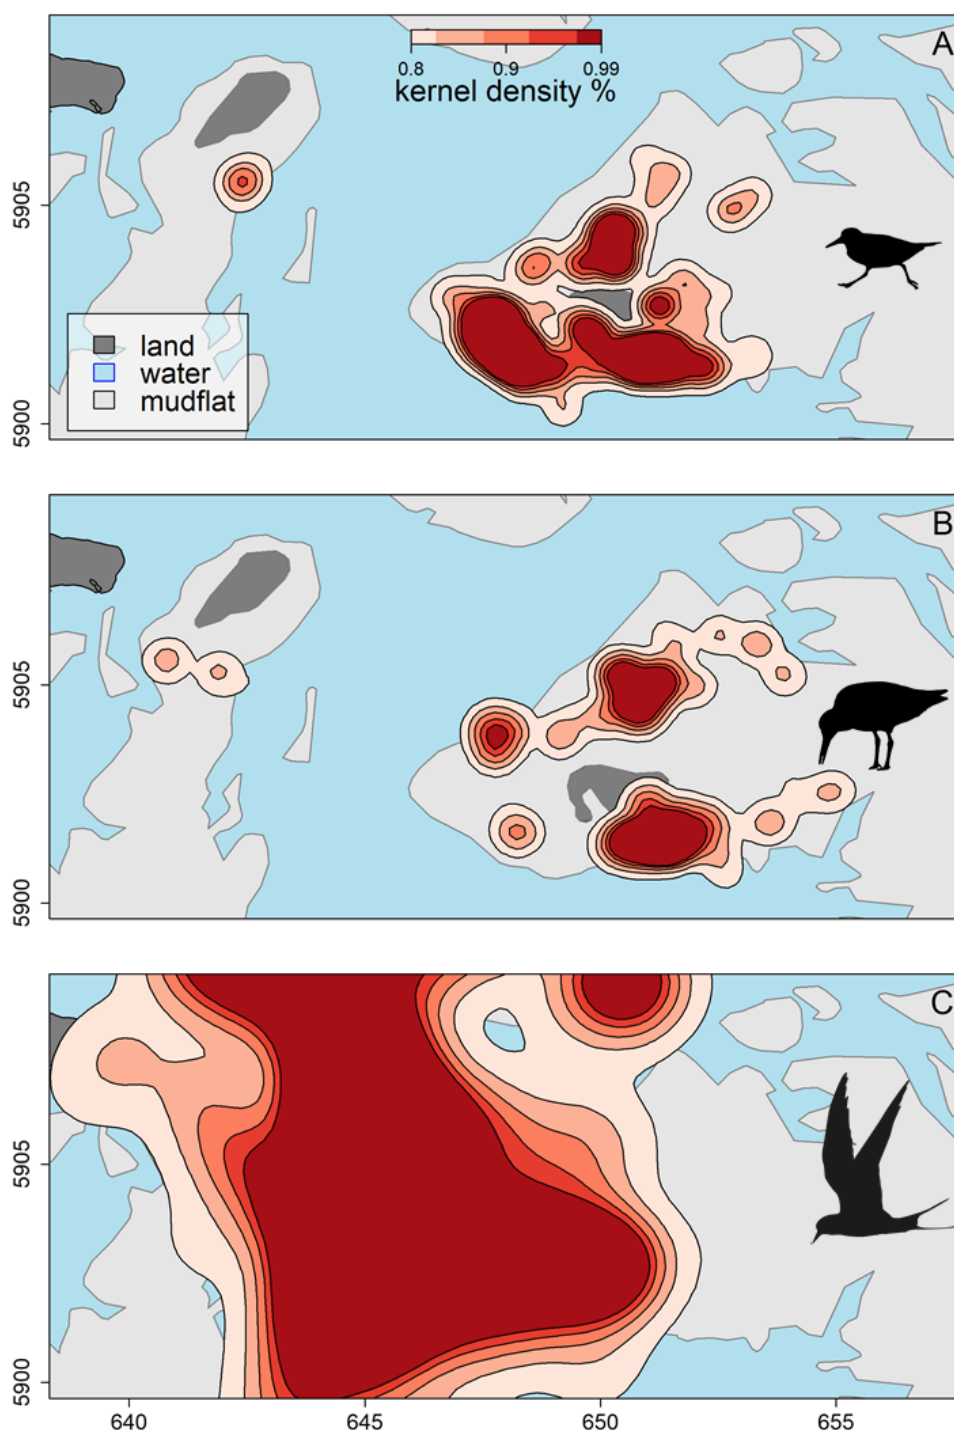

426 **Fig. 9 Space use by sanderlings, red knots and common terns.** The colour scale shows home  
427 range estimates with kernel densities for A) sanderling during a low tide period on 26 July  
428 2018, B) red knots during a low tide period on 25 August 2018, and C) common terns during  
429 the day on 6 June 2021. Water is coloured blue, land dark grey, and mudflats light grey. See  
430 rectangle A in Fig. 1 for placement of this map within the study area. The coordinate system  
431 refers to UTM 31N. © map data from Rijkswaterstaat.  
432

## 433 Discussion

434 With an array of 26 receiver stations located in the western Dutch Wadden Sea, WATLAS  
435 covers 1,326 km<sup>2</sup> and is currently the largest reverse-GPS tracking system worldwide. With  
436 examples from red knots, sanderlings, and common terns, we illustrated various applications  
437 of the high spatial and temporal resolution movement data obtained by WATLAS. Moreover,  
438 we provided examples of how high-throughput movement data can be utilized to study  
439 important aspects of animal movement ecology and space use, such as among-individual  
440 variation in behaviour, intra-specific interactions (social networks) as well as inter-specific  
441 interactions (community assembly). For regional-scale studies on small animals, reverse-GPS  
442 systems like WATLAS are a promising alternative to conventional GPS tracking.

443

## 444 TECHNICAL CONSIDERATIONS

445 For successful localization, reverse-GPS tracking like WATLAS, requires at least three  
446 receivers to detect the tag's signal, and signal detection requires a 'line of sight'. A study on  
447 the accuracy of WATLAS localizations, showed that tags ~1.2m from ground were mostly  
448 detected by receivers within 5 km of the tag (Beardsworth *et al.* 2021a). Near Richel and  
449 Griend, where the distances between receivers were smallest, localizations were most  
450 numerous. Near the edges of the array and on the large-scale of the entire study area, where  
451 the distance between receivers was largest (Fig. 1), tags were less often localized causing  
452 gaps in the tracks (Fig. 7). To avoid missing localizations, the density of receivers can be  
453 increased, and the array should surround the main area of interest (Beardsworth *et al.* 2021a).

454 Tags attached to animals in flight generally have larger detection ranges than animals  
455 on the ground, due to their usually greater height. For instance, in another ATLAS system  
456 (Toledo *et al.* 2020), Egyptian Fruit Bats *Rousettus aegyptiacus* were detected during flight  
457 up to 40 km away from the receivers. In our study system, we recorded similar detection

458 ranges of birds in flight, and we were able to localise them across the entire study area up to  
459 34 km from the nearest receiver.

460         The most substantial costs for reverse-GPS are setting up an initial array of receivers.  
461 But because the costs of a tags are low, reverse-GPS tracking systems allow tracking large  
462 and representative samples of animal populations (MacCurdy *et al.* 2019). The number of  
463 unique tags WATLAS systems can detect simultaneously is limited by the processing  
464 capability of the computer within the receiver, as well as interference of overlapping  
465 transmissions between tags. The percentage of missed tag transmissions increases  
466 exponentially as a function of the number of transmitters within range (see Fig. 3.5 in  
467 MacCurdy *et al.* 2015). Note that both limitations are not an intrinsic limitation of ATLAS,  
468 but a limitation of the current implementation. More powerful processors in the receivers  
469 will, for instance, allow more and simultaneous tag detections.

470         Another advantage of ATLAS systems is the weight of the trackers. The tag without  
471 battery and coating weighs as little as 0.6 g, which allows tracking small and light-weight  
472 individuals that were previously too small to track remotely at high spatial accuracy. Other  
473 tracking systems that allow tracking of smaller free-living individuals, include MOTUS  
474 (Taylor *et al.* 2017), and light-level geolocation data loggers (Bridge *et al.* 2013). These  
475 devices can provide high temporal resolution data or be used to track birds over large areas.  
476 Compared to WATLAS, however, the spatial accuracy of localizations with MOTUS and  
477 geolocation loggers is large (kms) and retrieving data from geolocation loggers requires  
478 recapturing the tracked animals. Recapturing can be problematic and prevents real-time  
479 observations and analyses of tracked animals. Another promising tracking system is ICARUS  
480 (Wikelski *et al.* 2007), but this is under development and tags are estimated to be larger than  
481 those of ATLAS.

482 Reverse-GPS systems have dramatically reduced tag energy consumption compared  
483 to GPS systems, which allows high temporal resolution localizations to be collected with  
484 small batteries (MacCurdy *et al.* 2019). Compared to GPS equivalents, tags can be expected  
485 to last for longer with a given number of localizations (MacCurdy *et al.* 2015). Because of the  
486 eight months maximum lifetime of WATLAS-tags used in this study, the tags are glued to the  
487 backs of birds and will fall off during body moult. From an ethical perspective this is  
488 preferred over e.g. full body harnesses (Chan *et al.* 2016), because animals need to cope with  
489 the added weight and potential aerodynamic discomfort only temporarily (Bowlin *et al.*  
490 2010). One potential downside of gluing tags to the birds is that trackers will end up in the  
491 environment. Given the ever-increasing number of tracking devices deployed, this is an  
492 ethical issue that ecologists and conservationists must deal with.

493

#### 494 OPPORTUNITIES FOR ANIMAL MOVEMENT ECOLOGY AND CONSERVATION

495 Simultaneously tracking many small birds in the Wadden Sea at high spatial and temporal  
496 resolution, allows for novel studies on e.g. among-individual variation, collective behaviour,  
497 and inter-specific interactions in the wild. Moreover, because individuals from different  
498 species and different trophic levels can be tracked simultaneously, exciting opportunities  
499 exist for studying movement ecology at the community level (Schlägel *et al.* 2020). Within  
500 the Dutch Wadden Sea, of particular interest is the ability to combine shorebird tracking with  
501 knowledge on their food resources. In this study, we illustrated differences in home range  
502 between sanderlings and red knots. Because sanderling prefer shrimp and red knot prefer  
503 shellfish (Piersma *et al.* 1993), the differences in space-use are likely related to differences in  
504 the distribution of their preferred prey. The uniquely large-scale mapping of resources on the  
505 intertidal mudflats with SIBES (Bijleveld *et al.* 2012; Compton *et al.* 2013) will offer

506 exciting opportunities for understanding consumer-resource interactions and space-use in  
507 intertidal ecosystems.

508           Despite strong legal protection and management measures being in place,  
509 many activities occur in the Dutch Wadden Sea that can have detrimental effects on its  
510 inhabitants (Kabat *et al.* 2012), such as commercial fishing, kite surfing, tourism, military  
511 exercises, and mining. In combination with large-scale phenomena, such as sea level rise and  
512 global warming (van de Pol *et al.* 2010), these anthropogenic activities can cause  
513 disturbances and habitat destruction, and thus contribute to population declines (van Gils *et*  
514 *al.* 2006a; Kraan *et al.* 2009). The causes underlying the declines of shorebird population  
515 numbers in the Wadden Sea are often debated, partly because of our limited understanding of  
516 environmental processes such as habitat use, which leads to tension and possibly conflict  
517 between stakeholders and management (Wolff 2005; Boere & Piersma 2012; Kabat *et al.*  
518 2012; Floor, van Koppen & Lindeboom 2013). The development of WATLAS has opened-up  
519 possibilities for quantifying space use of many small shorebirds directly, automatically, and  
520 at high spatiotemporal accuracy. WATLAS could thus aid in studies of impact assessment,  
521 such as assessing the effect of mining and subsiding mudflats on shorebird space use. More  
522 generally, WATLAS could facilitate evidence-based conservation, and aid the management  
523 of this UNESCO world heritage site.

524

## 525 CONCLUSION

526 In this study, we introduced WATLAS as a high-utility tracking system in the Dutch Wadden  
527 Sea, capable of tracking hundreds of small individuals simultaneously at high spatiotemporal  
528 resolution. After the initial investment for an array of receivers, the costs per tag are low,  
529 which facilitates regional, long-term studies on movement ecology and space use of many  
530 individuals and multiple species and facilitates collaboration between researchers across

531 research institutes. Because tags are light-weight as well as cheap, WATLAS can facilitate  
532 studies on, for instance, collective behaviour, social information use, and movement ecology  
533 of entire communities of free-living animals. WATLAS can also support evidence-based  
534 nature conservation and management, for example with assessing the impact of  
535 anthropogenic activities on space use of shorebirds. More generally, with WATLAS, animals  
536 can function as sentinels informing us about the state of the Wadden Sea ecosystem (Piersma  
537 & Lindström 2004), and thus aid nature conservation and management of this globally  
538 important ecosystem.

539

#### 540 **Acknowledgements**

541 This work was partly funded by the Dutch Research Council grand VI.Veni.192.051 awarded  
542 to AIB. Many people and organisations are involved in hosting the WATLAS equipment,  
543 without whom this study would be impossible. We, therefore, thank Hoogheemraadschap  
544 Hollands Noorderkwartier, Koninklijke Nederlandse Redding Maatschappij, Staatsbosbeheer,  
545 Marine Eco Analytics, Koninklijke Luchtmacht, Het Posthuys, Natuurmonumenten,  
546 Wetterskip Fryslan, Afsluitdijk Wadden Center, Vermilion, Rijkswaterstaat, Carl Zuhorn,  
547 Lenze Hofstee and Lydia de Loos. We thank Natuurmonumenten for access to Griend and  
548 using their facilities. Also, we thank Hein de Vries, Klaas Daalder, Hendrik-Jan Lokhorst,  
549 Bram Fey, Wim-Jan Boon from the RV Navicula and RV Stern, as well as the many other  
550 NIOZ staff and volunteers that facilitated this work. We would particularly like to thank  
551 Roeland Bom, Anita Koolhaas, Hinke and Cornelis Dekinga for their help with building the  
552 receiver stations, and Roeland Bom also for his help catching and tagging shorebirds. We  
553 thank Jeras de Jonge, Martin Laan, Sander Asjes, and Aris van der Vis for their technical  
554 help, and Benjamin Gnep for his beautiful photos and persistently replacing broken LNA's.  
555 Thanks to Marten Tacoma for visualizing the tracking data in real-time on

556 [www.nioz.nl/watlas](http://www.nioz.nl/watlas). We thank SOVON for catching and tagging the common terns on  
557 Griend. We also thank the Minerva Foundation and the Minerva Center for Movement  
558 Ecology and grants from the Israel Science Foundation to RN and ST (ISF grants 965/15 and  
559 1919/19) for supporting the development and maintenance of all ATLAS systems, and for  
560 Yotam Orchan and Yoav Bartan for their most valuable technical assistance. Finally, we  
561 thank Theunis Piersma for providing valuable comments and suggestions for improvements  
562 on an earlier version of this manuscript.

563

## 564 **References**

- 565 Aarts, G., Brasseur, S., Poos, J.J., Schop, J., Kirkwood, R., van Kooten, T., Mul, E.,  
566 Reijnders, P., Rijnsdorp, A.D. & Tulp, I. (2019) Top-down pressure on a coastal  
567 ecosystem by harbor seals. *Ecosphere*, **10**, e02538.
- 568 Allen, A.M., Ens, B.J., Van de Pol, M., Van der Jeugd, H., Frauendorf, M., Oosterbeek, K. &  
569 Jongejans, E. (2019) Seasonal survival and migratory connectivity of the Eurasian  
570 Oystercatcher revealed by citizen science. *The Auk*, **136**.
- 571 Allen, A.M. & Singh, N.J. (2016) Linking movement ecology with wildlife management and  
572 conservation. *Frontiers in Ecology and Evolution*, **3**.
- 573 Bakker, W., Ens, B.J., Dokter, A., van der Kolk, H.-J., Rappoldt, K., van de Pol, M., Troost,  
574 K., van der Veer, H.W., Bijleveld, A.I., van der Meer, J., Oosterbeek, K., Jongejans,  
575 E. & Allen, A.M. (2021) Connecting foraging and roosting areas reveals how food  
576 stocks explain shorebird numbers. *Estuarine, Coastal and Shelf Science*, **259**, 107458.
- 577 Beardsworth, C.E., Gobbens, E., Maarseveen, F.v., Denissen, B., Dekinga, A., Nathan, R.,  
578 Toledo, S. & Bijleveld, A.I. (2021a) Validating a high-throughput tracking system:  
579 ATLAS as a regional-scale alternative to GPS. *bioRxiv*.
- 580 Beardsworth, C.E., Whiteside, M.A., Laker, P.R., Nathan, R., Orchan, Y., Toledo, S., van  
581 Horik, J.O. & Madden, J.R. (2021b) Is habitat selection in the wild shaped by  
582 individual-level cognitive biases in orientation strategy? *Ecology Letters*, **24**, 751-760.
- 583 Bedriñana-Romano, L., Hucke-Gaete, R., Viddi, F.A., Johnson, D., Zerbini, A.N., Morales,  
584 J., Mate, B. & Palacios, D.M. (2021) Defining priority areas for blue whale  
585 conservation and investigating overlap with vessel traffic in Chilean Patagonia, using  
586 a fast-fitting movement model. *Scientific reports*, **11**, 2709.
- 587 Beukema, J. & Dekker, R. (2020) Half a century of monitoring macrobenthic animals on tidal  
588 flats in the Dutch Wadden Sea. *Marine Ecology Progress Series*, **656**, 1-18.
- 589 Bijleveld, A.I., MacCurdy, R.B., Chan, Y.-C., Penning, E., Gabrielson, R.M., Cluderay, J.,  
590 Spaulding, E.L., Dekinga, A., Holthuijsen, S., ten Horn, J., Brugge, M., van Gils, J.A.,  
591 Winkler, D.W. & Piersma, T. (2016) Understanding spatial distributions: negative  
592 density-dependence in prey causes predators to trade-off prey quantity with quality.  
593 *Proceedings of the Royal Society B: Biological Sciences*, **283**, 20151557.
- 594 Bijleveld, A.I., van Gils, J.A., van der Meer, J., Dekinga, A., Kraan, C., van der Veer, H.W.  
595 & Piersma, T. (2012) Designing a benthic monitoring programme with multiple  
596 conflicting objectives. *Methods in Ecology and Evolution*, **3**, 526-536.

- 597 Boere, G.C. & Piersma, T. (2012) Flyway protection and the predicament of our migrant  
598 birds: a critical look at international conservation policies and the Dutch Wadden Sea.  
599 *Ocean & Coastal Management*, **68**, 157-168.
- 600 Börger, L., Bijleveld, A.I., Fayet, A.L., Machovsky-Capuska, G.E., Patrick, S.C., Street,  
601 G.M. & Vander Wal, E. (2020) Biologging special feature. *Journal of Animal*  
602 *Ecology*, **89**, 6-15.
- 603 Bowlin, M.S., Henningsson, P., Muijres, F.T., Vleugels, R.H.E., Liechti, F. & Hedenström,  
604 A. (2010) The effects of geolocator drag and weight on the flight ranges of small  
605 migrants. *Methods in Ecology and Evolution*, **1**, 398-402.
- 606 Bridge, E.S., Kelly, J.F., Contina, A., Gabrielson, R.M., MacCurdy, R.B. & Winkler, D.W.  
607 (2013) Advances in tracking small migratory birds: a technical review of light-level  
608 geolocation. *Journal of Field Ornithology*, **84**, 121-137.
- 609 Chan, Y.-C., Brugge, M., Tibbitts, T.L., Dekinga, A., Porter, R., Klaassen, R.H. & Piersma,  
610 T. (2016) Testing an attachment method for solar-powered tracking devices on a long-  
611 distance migrating shorebird. *Journal of Ornithology*, **157**, 277-287.
- 612 Choi, C.-Y., Peng, H.-B., He, P., Ren, X.-T., Zhang, S., Jackson, M.V., Gan, X., Chen, Y.,  
613 Jia, Y. & Christie, M. (2019) Where to draw the line? Using movement data to inform  
614 protected area design and conserve mobile species. *Biological Conservation*, **234**, 64-  
615 71.
- 616 Compton, T.J., Holthuijsen, S., Koolhaas, A., Dekinga, A., ten Horn, J., Smith, J., Galama,  
617 Y., Brugge, M., van der Wal, D., van der Meer, J., van der Veer, H.W. & Piersma, T.  
618 (2013) Distinctly variable mudscapes: distribution gradients of intertidal macrofauna  
619 across the Dutch Wadden Sea. *Journal of Sea Research*, **82**, 103-116.
- 620 Dickie, M., McNay, S.R., Sutherland, G.D., Cody, M. & Avgar, T. (2020) Corridors or risk?  
621 Movement along, and use of, linear features varies predictably among large mammal  
622 predator and prey species. *Journal of Animal Ecology*, **89**, 623-634.
- 623 Ersoy, S., Beardsworth, C.E., Dekinga, A., van der Meer, M., Piersma, T., Groothuis, T.G. &  
624 Bijleveld, A.I. (in press) Exploration speed in captivity predicts foraging  
625 specialisation in free-living red knots *Calidris canutus*. *Journal of Animal Ecology*.
- 626 Farine, D.R. & Whitehead, H. (2015) Constructing, conducting and interpreting animal social  
627 network analysis. *Journal of Animal Ecology*, **84**, 1144-1163.
- 628 Floor, J.R., van Koppen, C.S.A. & Lindeboom, H.J. (2013) A review of science-policy  
629 interactions in the Dutch Wadden Sea — The cockle fishery and gas exploitation  
630 controversies. *Journal of Sea Research*, **82**, 165-175.
- 631 Fortin, D., Beyer, H.L., Boyce, M.S., Smith, D.W., Duchesne, T. & Mao, J.S. (2005) Wolves  
632 influence elk movements: behavior shapes a trophic cascade in Yellowstone National  
633 Park. *Ecology*, **86**, 1320-1330.
- 634 Gill, R.E., Tibbitts, T.L., Douglas, D.C., Handel, C.M., Mulcahy, D.M., Gottschalck, J.C.,  
635 Warnock, N., McCaffery, B.J., Battley, P.F. & Piersma, T. (2009) Extreme endurance  
636 flights by landbirds crossing the Pacific Ocean: ecological corridor rather than  
637 barrier? *Proceedings of the Royal Society B: Biological Sciences*, **276**, 447-457.
- 638 Guilford, T. & Biro, D. (2014) Route following and the pigeon's familiar area map. *Journal*  
639 *of Experimental Biology*, **217**, 169-179.
- 640 Gupte, P.R., Beardsworth, C.E., Spiegel, O., Lourie, E., Toledo, S., Nathan, R. & Bijleveld,  
641 A.I. (in press) A guide to pre-processing high-throughput animal tracking data.  
642 *Journal of Animal Ecology*.
- 643 Harten, L., Katz, A., Goldshtein, A., Handel, M. & Yovel, Y. (2020) The ontogeny of a  
644 mammalian cognitive map in the real world. *Science*, **369**, 194-197.
- 645 Hays, G.C., Bailey, H., Bograd, S.J., Bowen, W.D., Campagna, C., Carmichael, R.H., Casale,  
646 P., Chiaradia, A., Costa, D.P., Cuevas, E., Nico de Bruyn, P.J., Dias, M.P., Duarte,



- 647 C.M., Dunn, D.C., Dutton, P.H., Esteban, N., Friedlaender, A., Goetz, K.T., Godley,  
648 B.J., Halpin, P.N., Hamann, M., Hammerschlag, N., Harcourt, R., Harrison, A.-L.,  
649 Hazen, E.L., Heupel, M.R., Hoyt, E., Humphries, N.E., Kot, C.Y., Lea, J.S.E., Marsh,  
650 H., Maxwell, S.M., McMahon, C.R., Notarbartolo di Sciara, G., Palacios, D.M.,  
651 Phillips, R.A., Righton, D., Schofield, G., Seminoff, J.A., Simpfendorfer, C.A., Sims,  
652 D.W., Takahashi, A., Tetley, M.J., Thums, M., Trathan, P.N., Villegas-Amtmann, S.,  
653 Wells, R.S., Whiting, S.D., Wildermann, N.E. & Sequeira, A.M.M. (2019)  
654 Translating marine animal tracking data into conservation policy and management.  
655 *Trends in Ecology & Evolution*, **34**, 459-473.
- 656 Hertel, A.G., Royauté, R., Zedrosser, A. & Mueller, T. (2021) Biologging reveals individual  
657 variation in behavioural predictability in the wild. *Journal of Animal Ecology*, **90**,  
658 723-737.
- 659 Joo, R., Boone, M.E., Clay, T.A., Patrick, S.C., Clusella-Trullas, S. & Basille, M. (2020a)  
660 Navigating through the R packages for movement. *Journal of Animal Ecology*, **89**,  
661 248-267.
- 662 Joo, R., Picardi, S., Boone, M.E., Clay, T.A., Patrick, S.C., Romero-Romero, V.S. & Basille,  
663 M. (2020b) A decade of movement ecology. *arXiv preprint arXiv:2006.00110*.
- 664 Kabat, P., Bazelmans, J., van Dijk, J., Herman, P.M.J., van Oijen, T., Pejrup, M., Reise, K.,  
665 Speelman, H. & Wolff, W.J. (2012) The Wadden Sea Region: Towards a science for  
666 sustainable development. *Ocean & Coastal Management*, **68**, 4-17.
- 667 Kays, R., Crofoot, M.C., Jetz, W. & Wikelski, M. (2015) Terrestrial animal tracking as an  
668 eye on life and planet. *Science*, **348**, aaa2478.
- 669 King, A.J., Fehlmann, G., Biro, D., Ward, A.J. & Fürtbauer, I. (2018) Re-wilding collective  
670 behaviour: an ecological perspective. *Trends in Ecology & Evolution*, **33**, 347-357.
- 671 Kraan, C., van Gils, J.A., Spaans, B., Dekinga, A., Bijleveld, A.I., van Roomen, M.,  
672 Kleefstra, R. & Piersma, T. (2009) Landscape-scale experiment demonstrates that  
673 Wadden Sea intertidal flats are used to capacity by molluscivore migrant shorebirds.  
674 *Journal of Animal Ecology*, **78**, 1259-1268.
- 675 Lindström, Å., Alerstam, T., Andersson, A., Bäckman, J., Bahlenberg, P., Bom, R., Ekblom,  
676 R., Klaassen, R.H.G., Korniluk, M., Sjöberg, S. & Weber, J.K.M. (2021) Extreme  
677 altitude changes between night and day during marathon flights of great snipes.  
678 *Current Biology*, **31**, 3433-3439.
- 679 MacCurdy, R.B., Bijleveld, A.I., Gabrielson, R.M., Cluderay, J., Spaulding, E.L., Oudman,  
680 T., van Gils, J.A., Dekinga, A., Piersma, T. & Winkler, D.W. (2015) Automatic,  
681 intensive wildlife radiotracking. *Untying the knot: Mechanistically understanding the*  
682 *interactions between social foragers and their prey*, pp. 41-56.
- 683 MacCurdy, R.B., Bijleveld, A.I., Gabrielson, R.M. & Cortopassi, K.A. (2019) Automated  
684 wildlife radio tracking. *Handbook of position location: theory, practice, and advances*  
685 (eds S.A. Zekavat & R.M. Buehrer). John Wiley & Sons, Inc., Hoboken, New Jersey,  
686 USA.
- 687 MacCurdy, R.B., Gabrielson, R.M. & Cortopassi, K.A. (2011) Automated wildlife radio  
688 tracking. *Handbook of position location: theory, practice, and advances* (eds S.A.  
689 Zekavat & R.M. Buehrer), pp. 1129-1167. John Wiley & Sons, Inc., Hoboken, New  
690 Jersey, USA.
- 691 MacCurdy, R.B., Gabrielson, R.M., Spaulding, E., Purgue, A., Cortopassi, K.A. & Fristrup,  
692 K.M. (2009) Automatic animal tracking using matched filters and time difference of  
693 arrival. *Journal of Communications*, **4**, 487-495.
- 694 Melamed, I. & Toledo, S. (2017) A robust, selective, and flexible RF front-end for wideband  
695 sampling receivers. *ICT Express*, **3**, 96-100.

- 696 Middleton, A.D., Sawyer, H., Merkle, J.A., Kauffman, M.J., Cole, E.K., Dewey, S.R., Gude,  
697 J.A., Gustine, D.D., McWhirter, D.E. & Proffitt, K.M. (2020) Conserving  
698 transboundary wildlife migrations: recent insights from the Greater Yellowstone  
699 Ecosystem. *Frontiers in Ecology and the Environment*, **18**, 83-91.
- 700 Murgatroyd, M., Redpath, S.M., Murphy, S.G., Douglas, D.J.T., Saunders, R. & Amar, A.  
701 (2019) Patterns of satellite tagged hen harrier disappearances suggest widespread  
702 illegal killing on British grouse moors. *Nature Communications*, **10**, 1094.
- 703 Nathan, R., Getz, W.M., Revilla, E., Holyoak, M., Kadmon, R., Saltz, D. & Smouse, P.E.  
704 (2008) A movement ecology paradigm for unifying organismal movement research.  
705 *Proceedings of the National Academy of Sciences of the United States of America*,  
706 **105**, 19052-19059.
- 707 Oudman, T., Piersma, T., Ahmedou Salem, M.V., Feis, M.E., Dekinga, A., Holthuijsen, S.,  
708 ten Horn, J., van Gils, J.A. & Bijleveld, A.I. (2018) Resource landscapes explain  
709 contrasting patterns of aggregation and site fidelity by red knots at two wintering  
710 sites. *Movement Ecology*, **6**, 24.
- 711 Pekarsky, S., Schiffner, I., Markin, Y. & Nathan, R. (2021) Using movement ecology to  
712 evaluate the effectiveness of multiple human-wildlife conflict management practices.  
713 *Biological Conservation*, **262**, 109306.
- 714 Piersma, T., Hoekstra, R., Dekinga, A., Koolhaas, A., Wolf, P., Battley, P.F. & Wiersma, P.  
715 (1993) Scale and intensity of intertidal habitat use by knots *Calidris canutus* in the  
716 Western Wadden Sea in relation to food, friends and foes. *Netherlands Journal of Sea  
717 Research*, **31**, 331-357.
- 718 Piersma, T. & Lindström, Å. (2004) Migrating shorebirds as integrative sentinels of global  
719 environmental change. *Ibis*, **146**, 61-69.
- 720 Preisler, H.K., Ager, A.A. & Wisdom, M.J. (2013) Analyzing animal movement patterns  
721 using potential functions. *Ecosphere*, **4**, 1-13.
- 722 Rakhimberdiev, E., Duijns, S., Karagicheva, J., Camphuysen, C.J., Dekinga, A., Dekker, R.,  
723 Gavrilov, A., Ten Horn, J., Jukema, J. & Saveliev, A. (2018) Fuelling conditions at  
724 staging sites can mitigate Arctic warming effects in a migratory bird. *Nature  
725 Communications*, **9**, 1-10.
- 726 Robitaille, A.L., Webber, Q.M.R. & Vander Wal, E. (2019) Conducting social network  
727 analysis with animal telemetry data: applications and methods using spatsoc. *Methods  
728 in Ecology and Evolution*, **10**, 1203-1211.
- 729 Schlägel, U.E., Grimm, V., Blaum, N., Colangeli, P., Dammhahn, M., Eccard, J.A.,  
730 Hausmann, S.L., Herde, A., Hofer, H. & Joshi, J. (2020) Movement-mediated  
731 community assembly and coexistence. *Biological Reviews*, **95**, 1073-1096.
- 732 Shaw, A.K. (2020) Causes and consequences of individual variation in animal movement.  
733 *Movement Ecology*, **8**, 12.
- 734 Signer, J., Fieberg, J. & Avgar, T. (2019) Animal movement tools (amt): R package for  
735 managing tracking data and conducting habitat selection analyses. *Ecology and  
736 Evolution*, **9**, 880-890.
- 737 Strandburg-Peshkin, A., Farine, D.R., Couzin, I.D. & Crofoot, M.C. (2015) Shared decision-  
738 making drives collective movement in wild baboons. *Science*, **348**, 1358-1361.
- 739 Strandburg-Peshkin, A., Farine, D.R., Crofoot, M.C. & Couzin, I.D. (2017) Habitat and  
740 social factors shape individual decisions and emergent group structure during baboon  
741 collective movement. *Elife*, **6**, e19505.
- 742 Taylor, P., Crewe, T., Mackenzie, S., Lepage, D., Aubry, Y., Crysler, Z., Finney, G., Francis,  
743 C., Guglielmo, C. & Hamilton, D. (2017) The Motus wildlife tracking system: a  
744 collaborative research network to enhance the understanding of wildlife movement.  
745 *Avian Conservation and Ecology*, **12**, 8.

- 746 Toledo, S., Shohami, D., Schiffner, I., Lourie, E., Orchan, Y., Bartan, Y. & Nathan, R. (2020)  
747 Cognitive map-based navigation in wild bats revealed by a new high-throughput  
748 tracking system. *Science*, **369**, 188-193.
- 749 Tucker, M.A., Böhning-Gaese, K., Fagan, W.F., Fryxell, J.M., Van Moorter, B., Alberts,  
750 S.C., Ali, A.H., Allen, A.M., Attias, N., Avgar, T., Bartlam-Brooks, H., Bayarbaatar,  
751 B., Belant, J.L., Bertassoni, A., Beyer, D., Bidner, L., van Beest, F.M., Blake, S.,  
752 Blaum, N., Bracis, C., Brown, D., de Bruyn, P.J.N., Cagnacci, F., Calabrese, J.M.,  
753 Camilo-Alves, C., Chamaillé-Jammes, S., Chiaradia, A., Davidson, S.C., Dennis, T.,  
754 DeStefano, S., Diefenbach, D., Douglas-Hamilton, I., Fennessy, J., Fichtel, C.,  
755 Fiedler, W., Fischer, C., Fischhoff, I., Fleming, C.H., Ford, A.T., Fritz, S.A., Gehr, B.,  
756 Goheen, J.R., Gurarie, E., Hebblewhite, M., Heurich, M., Hewison, A.J.M., Hof, C.,  
757 Hurme, E., Isbell, L.A., Janssen, R., Jeltsch, F., Kaczensky, P., Kane, A., Kappeler,  
758 P.M., Kauffman, M., Kays, R., Kimuyu, D., Koch, F., Kranstauber, B., LaPoint, S.,  
759 Leimgruber, P., Linnell, J.D.C., López-López, P., Markham, A.C., Mattisson, J.,  
760 Medici, E.P., Mellone, U., Merrill, E., de Miranda Mourão, G., Morato, R.G.,  
761 Morellet, N., Morrison, T.A., Díaz-Muñoz, S.L., Mysterud, A., Nandintsetseg, D.,  
762 Nathan, R., Niamir, A., Odden, J., O'Hara, R.B., Oliveira-Santos, L.G.R., Olson,  
763 K.A., Patterson, B.D., Cunha de Paula, R., Pedrotti, L., Reineking, B., Rimmler, M.,  
764 Rogers, T.L., Rolandsen, C.M., Rosenberry, C.S., Rubenstein, D.I., Safi, K., Saïd, S.,  
765 Sapir, N., Sawyer, H., Schmidt, N.M., Selva, N., Sergiel, A., Shiilegdamba, E., Silva,  
766 J.P., Singh, N., Solberg, E.J., Spiegel, O., Strand, O., Sundaresan, S., Ullmann, W.,  
767 Voigt, U., Wall, J., Wattles, D., Wikelski, M., Wilmers, C.C., Wilson, J.W.,  
768 Wittemyer, G., Zięba, F., Zwijacz-Kozica, T. & Mueller, T. (2018) Moving in the  
769 anthropocene: global reductions in terrestrial mammalian movements. *Science*, **359**,  
770 466-469.
- 771 van de Kam, J., Ens, B., Piersma, T. & Zwarts, L. (2004) *Shorebirds. An illustrated*  
772 *behavioral ecology*. KNNV Publishers, Utrecht, The Netherlands.
- 773 van de Pol, M., Ens, B.J., Heg, D., Brouwer, L., Krol, J., Maier, M., Exo, K.M., Oosterbeek,  
774 K., Lok, T. & Eising, C.M. (2010) Do changes in the frequency, magnitude and  
775 timing of extreme climatic events threaten the population viability of coastal birds?  
776 *Journal of Applied Ecology*, **47**, 720-730.
- 777 van der Veer, H.W., Dapper, R., Henderson, P.A., Jung, A.S., Philippart, C.J., Witte, J.I.J. &  
778 Zuur, A.F. (2015) Changes over 50 years in fish fauna of a temperate coastal sea:  
779 Degradation of trophic structure and nursery function. *Estuarine, Coastal and Shelf*  
780 *Science*, **155**, 156-166.
- 781 van Gils, J.A., Piersma, T., Dekinga, A., Spaans, B. & Kraan, C. (2006a) Shellfish dredging  
782 pushes a flexible avian top predator out of a marine protected area. *PLoS Biology*, **4**,  
783 2399-2404.
- 784 van Gils, J.A., Spaans, B., Dekinga, A. & Piersma, T. (2006b) Foraging in a tidally structured  
785 environment by red knots (*Calidris canutus*): ideal, but not free. *Ecology*, **87**, 1189-  
786 1202.
- 787 van Roomen, M., Laursen, K., van Turnhout, C., van Winden, E., Blew, J., Eskildsen, K.,  
788 Günther, K., Hälterlein, B., Kleefstra, R., Potel, P., Schrader, S., Luerssen, G. & Ens,  
789 B.J. (2012) Signals from the Wadden sea: population declines dominate among  
790 waterbirds depending on intertidal mudflats. *Ocean & Coastal Management*, **68**, 79-  
791 88.
- 792 Verhoeven, M.A., Loonstra, A., Senner, N.R., McBride, A.D., Both, C. & Piersma, T. (2019)  
793 Variation from an unknown source: large inter-individual differences in migrating  
794 black-tailed godwits. *Frontiers in Ecology and Evolution*, **7**, 31.

- 795 Weller-Weiser, A., Orchan, Y., Nathan, R., Charter, M., Weiss, A.J. & Toledo, S. (2016)  
796 Characterizing the accuracy of a self-synchronized reverse-GPS wildlife localization  
797 system. *15th International Conference on Information Processing in Sensor*  
798 *Networks*, pp. 1-12. IEEE.
- 799 Wikelski, M., Kays, R.W., Kasdin, N.J., Thorup, K., Smith, J.A. & Swenson, G.W. (2007)  
800 Going wild: what a global small-animal tracking system could do for experimental  
801 biologists. *Journal of Experimental Biology*, **210**, 181-186.
- 802 Williams, H.J., Taylor, L.A., Benhamou, S., Bijleveld, A.I., Clay, T.A., de Grissac, S.,  
803 Demšar, U., English, H.M., Franconi, N. & Gómez-Laich, A. (2020) Optimising the  
804 use of biologgers for movement ecology research. *Journal of Animal Ecology*, **89**,  
805 186-206.
- 806 Wolff, W.J. (2005) The exploitation of living resources in the Dutch Wadden Sea: a historical  
807 overview. *Helgoland Marine Research*, **59**, 31-38.
- 808 Xia, H., Bertoni, H.L., Maciel, L.R., Lindsay-Stewart, A. & Rowe, R. (1993) Radio  
809 propagation characteristics for line-of-sight microcellular and personal  
810 communications. *IEEE Transactions on antennas and propagation*, **41**, 1439-1447.
- 811 Zwarts, L., Blomert, A.-M. & Wanink, J.H. (1992) Annual and seasonal variation in the food  
812 supply harvestable by knot *Calidris canutus* staging in the Wadden Sea in late  
813 summer. *Marine Ecology Progress Series*, 129-139.
- 814
